# Supplementary material
Source: Springer Nature journal article supplement (https://www.springermedizin.de/resource/supplementary/13075_2014_4243_MOESM6_ESM.pdf/9696466)

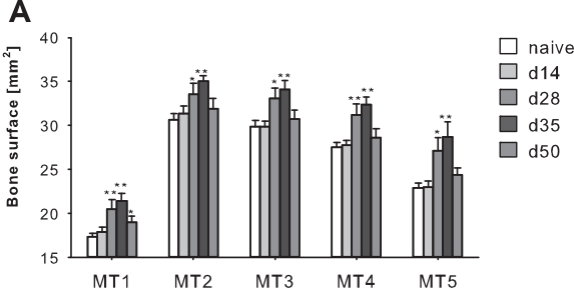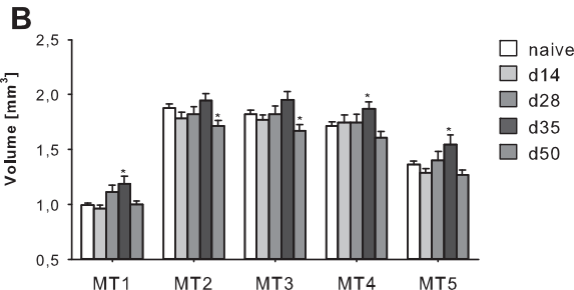

Supplement: MOESM6 [file 9696466]
